# Supplementary material for: SATB1 Mediates Long-Range Chromatin Interactions: A Dual Regulator of Anti-Apoptotic BCL2 and Pro-Apoptotic NOXA Genes
Source: PubMed Central journal article supplement (PMC4589335; doi:10.1371/journal.pone.0139170), 2015-09-30
Supplement: pone.0139170.s006.pdf [file pone.0139170.s006.pdf]

**Table S1. Primers used in the present study.**

| Primers        |             | Sequence (5'-3')          |                          |
|----------------|-------------|---------------------------|--------------------------|
| ChIP           | NOXA-SBS1-F | GTTGCCTAAGGTTTGTAGCCAG    |                          |
|                | NOXA-SBS1-R | TCCAGGCTCATTTTGACTTACC    |                          |
|                | NOXA-SBS2-F | CATTTTTGAACTTGTTCACGA     |                          |
|                | NOXA-SBS2-R | GGTATCATTTAATGTTGGGCTT    |                          |
|                | NOXA-SBS3-F | ACAAACATGCTATACAGGAAAACAA |                          |
|                | NOXA-SBS3-R | AACCACAATGACAAAACAAAATAAG |                          |
|                | BCL2-SBS1-F | GGCATCTTGGCTATAATCAGTC    |                          |
|                | BCL2-SBS1-R | GCCCAAAGACGAGTAGTCAA      |                          |
|                | mbr-F       | GCAGGATAGCAGCACAGGATT     |                          |
|                | mbr-R       | GGCCTCAGGGAACAGAATGAT     |                          |
|                | 3C          | BCL2/mbr-F                | AATTCATAGACAGGGTCAAT     |
|                |             | BCL2/mbr-R                | TTGCACTCGAGCCCTATTAAG    |
| AseI-PGK1-F    |             | ATGTCCCTGGAGGTATCAATCT    |                          |
| AseI-PGK1-R    |             | GCAGCCACTACTCAGGAAGC      |                          |
| NOXA/mbr-F     |             | GATCTTATTCTGTGGTGTCTTTTG  |                          |
| NOXA/mbr-R     |             | TCTAAATCTAAACAGAGAACCCAGT |                          |
| NOXA/BCL2-F    |             | TAACATTCTTCTGTGCTGCTA     |                          |
| NOXA/BCL2-R    |             | TCTAAATCTAAACAGAGAACCCAGT |                          |
| NOXA-1/mbr-F   |             | CGGACCAGAAAGTGCTATGC      |                          |
| NOXA-1/mbr-R   |             | GATCTTATTCTGTGGTGTCTTTTG  |                          |
| NOXA-2/mbr-F   |             | ACACCGCAGGGTATGTCTATCA    |                          |
| NOXA-2/mbr-R   |             | GATCTTATTCTGTGGTGTCTTTTG  |                          |
| HindIII-PGK1-F |             | CTTCTCTTTCACCTCTACCCCT    |                          |
| HindIII-PGK1-R |             | TTACAGTATAATACAAAACCTCCAA |                          |
| RT-PCR         |             | BCL2-RTN-F                | TCGCCCTGTGGATGACTGAG     |
|                |             | BCL2-RTN-R                | CAGAGTCTTCAGAGACAGCCAGGA |
|                |             | NOXA-RTN-F                | GCAGAGCTGGAAGTCGAGTGT    |
|                |             | NOXA-RTN-R                | CTCTTTTGAAGGAGTCCCCTCAT  |
|                | Actin-RTN-F | TCATGAAGTGTGACGTGGACAT    |                          |
|                | Actin-RTN-R | CTCAGGAGGAGCAATGATCTTG    |                          |
